# Supplementary material for: Exosome-based rare earth nanoparticles for targetedin situand metastatic tumor imaging with chemo-assisted immunotherapy
Source: Royal Society of Chemistry journal article supplement (doi:10.1039/d1bm01809d), 2021-12-09
Supplement: d1bm01809d1.pdf [file d1bm01809d1.pdf]

## Supporting Information

### Exosome-based rare earth nanoparticles for targeted *in situ* and metastatic tumor imaging with chemo-assisted immunotherapy

*Bi Lin,<sup>a</sup> Yanxing Wang,<sup>a</sup> Kun Zhao,<sup>b</sup> Wei-Dong Lü,<sup>b,\*</sup> Xin Hui,<sup>a</sup> Yaqun Ma,<sup>a</sup> and Ruichan Lv<sup>a,\*</sup>*

<sup>a</sup> Engineering Research Center of Molecular and Neuro Imaging, Ministry of Education, School of Life Science and Technology, Xidian University, Xi'an, Shanxi 710071, China. Email: [rclv@xidian.edu.cn](mailto:rclv@xidian.edu.cn)

<sup>b</sup> Department of Thoracic Surgery, Tumor Hospital of Shaanxi Province, Affiliated to the Medical College of Xi'an Jiaotong University, Xi'an, Shaanxi 710061, China. Email: [wdu76@126.com](mailto:wdu76@126.com)

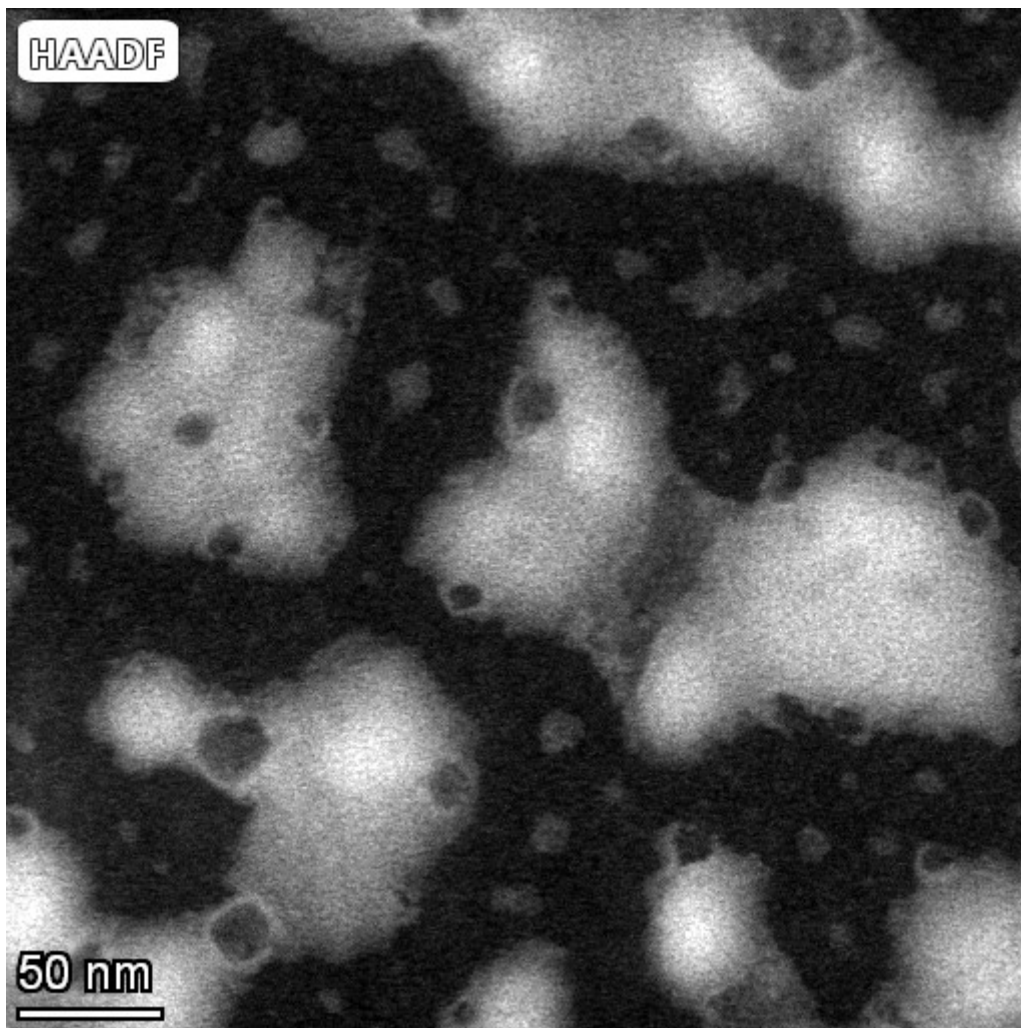

**Figure S1.** The element mapping overlay of the E-RENPs.

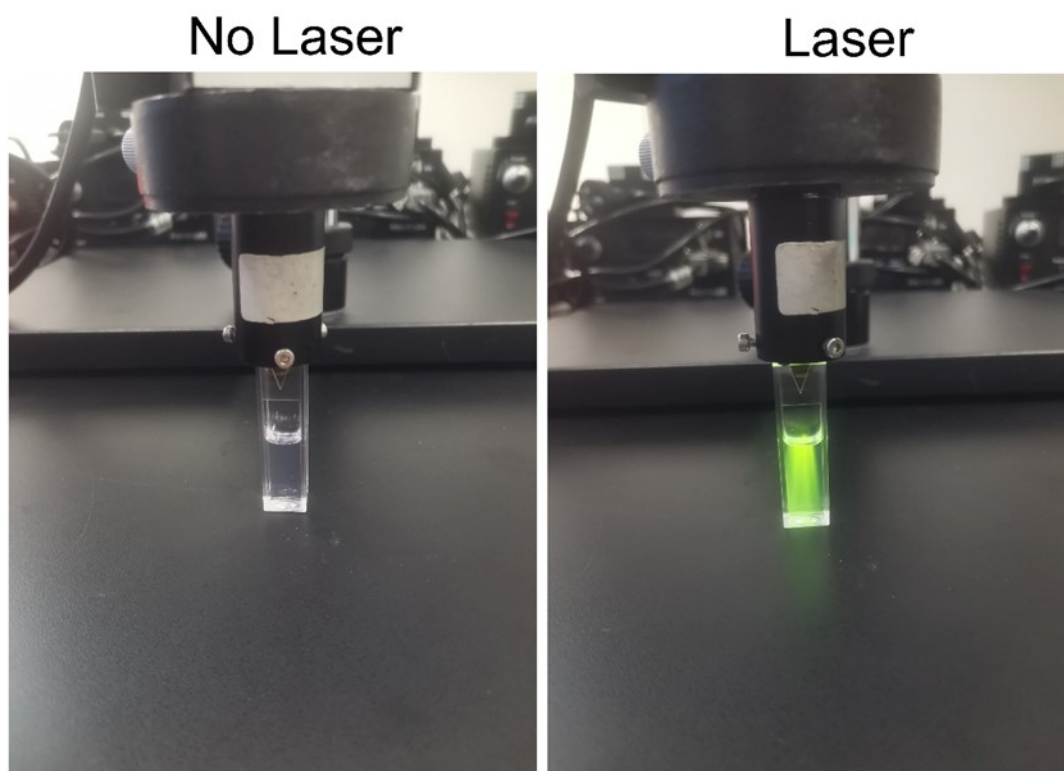

**Figure S2.** Under the irradiation of 980 nm laser, the UCL fluorescence imaging of RENPs..

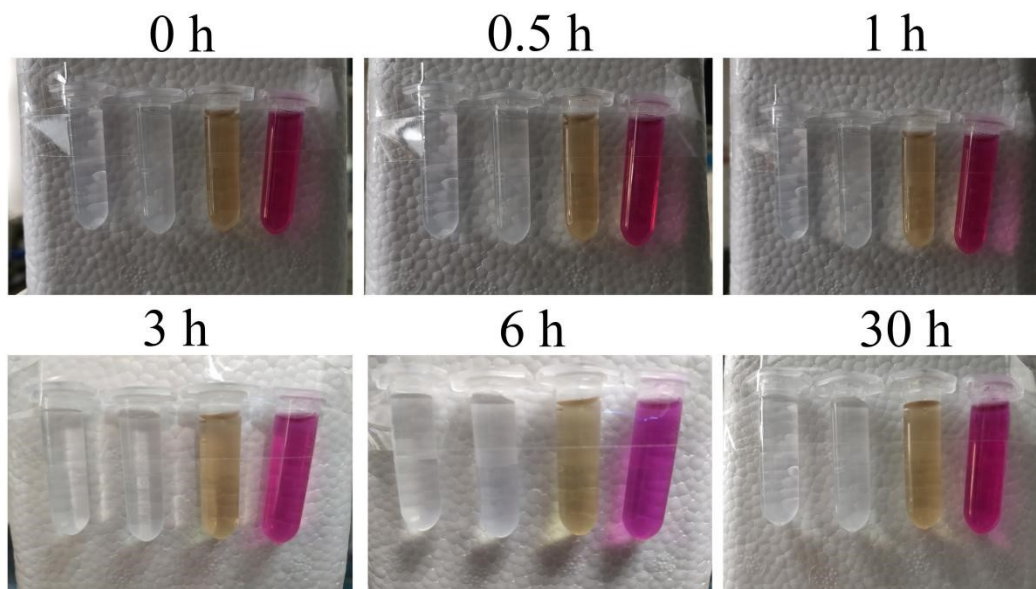

**Figure S3.** The biostability photographs of RENPs.

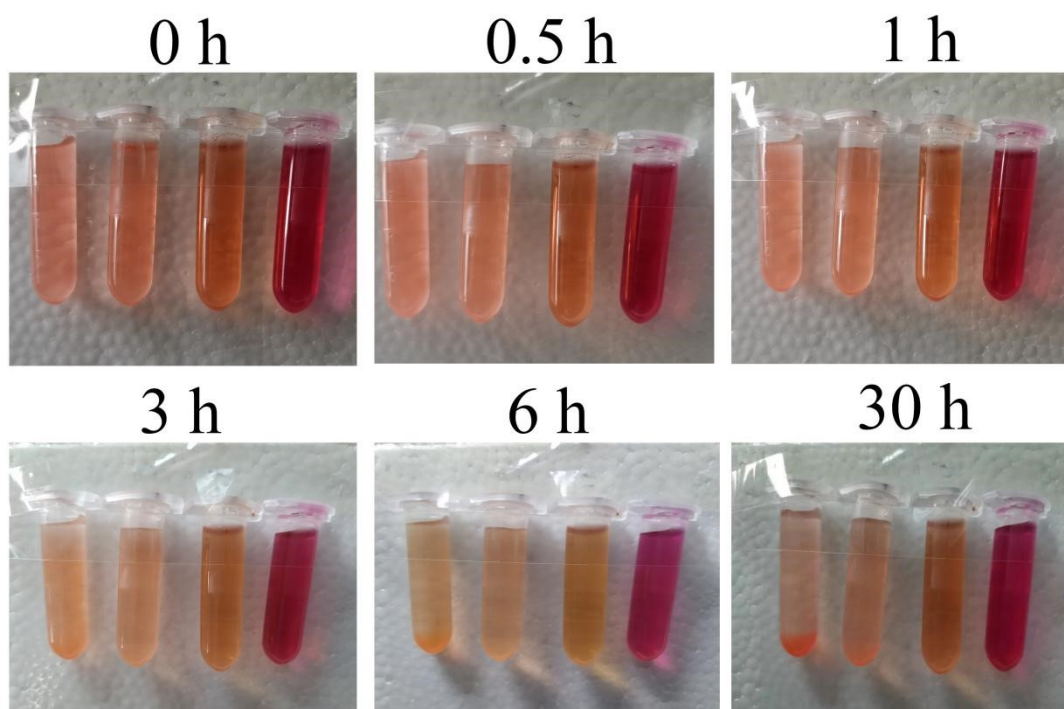

**Figure S4.** The biostability photographs of DOX/2DG@RENPs.

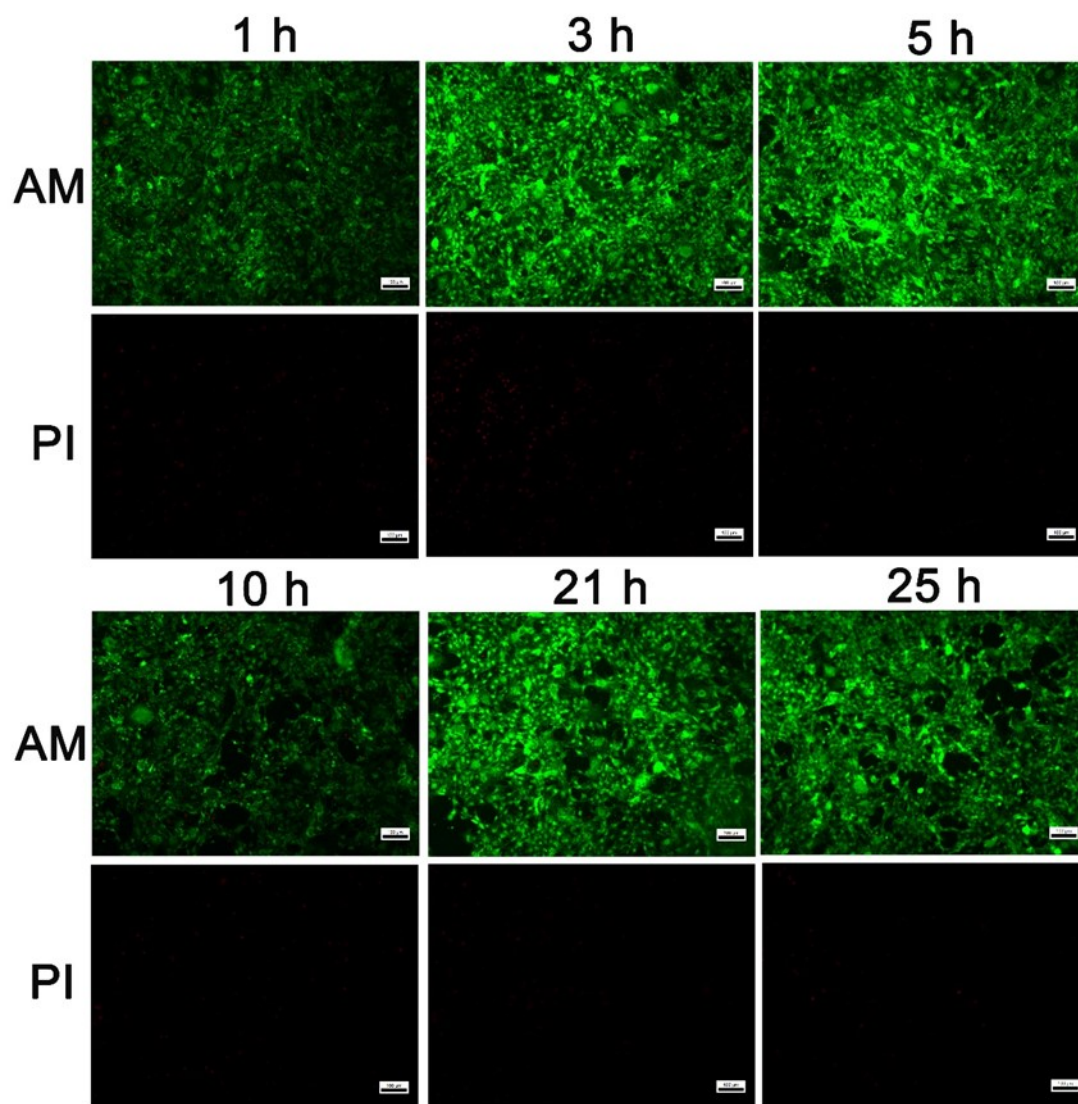

**Figure S5.** The fluorescence imaging of RENPs was detected by AM/PI for dead and living cells.

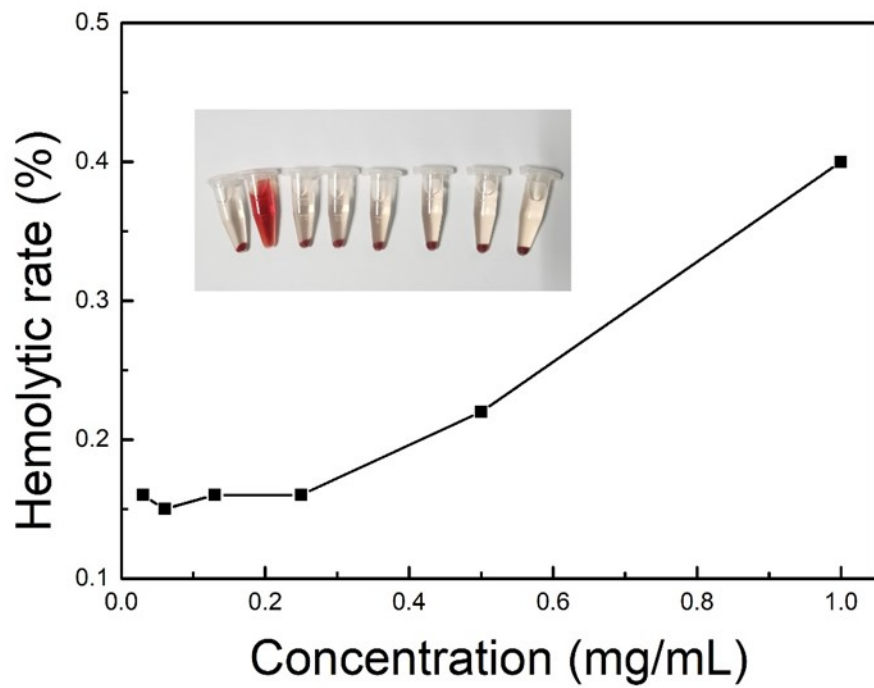

**Figure S6.** The hemolysis rate of the RENPs.

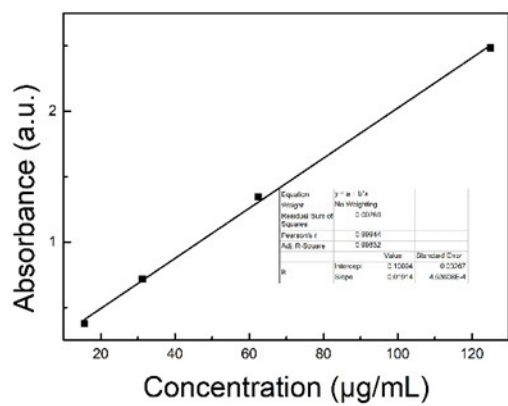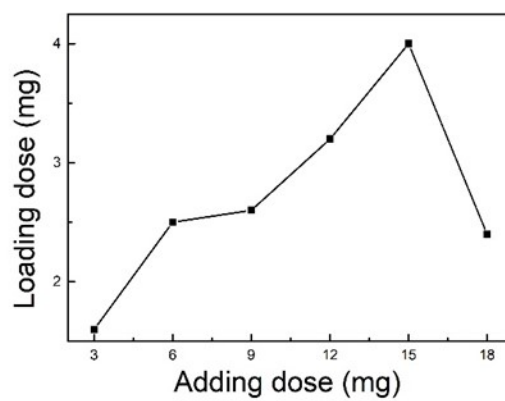

**Figure S7.** The graph of DOX was added with different weights



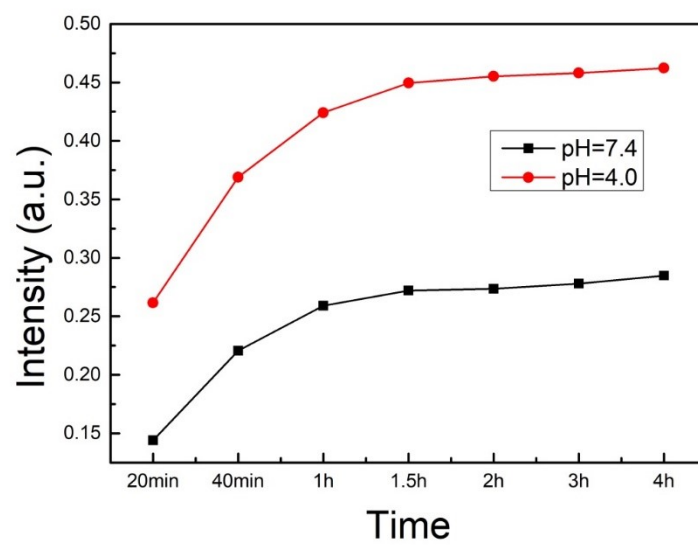

**Figure S8.** The DOX release rate curves of 2DG/DOX@RENPs.

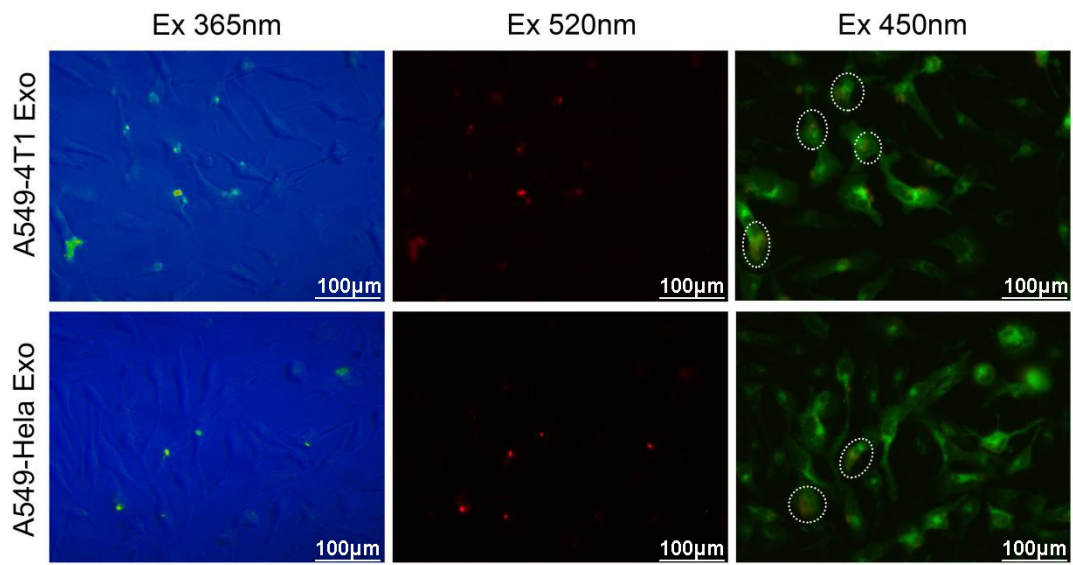

**Figure S9.** Fluorescence microscopy images of A549 cells co-incubated with E-RENPs of 4T1 cells or Hela cells, respectively.

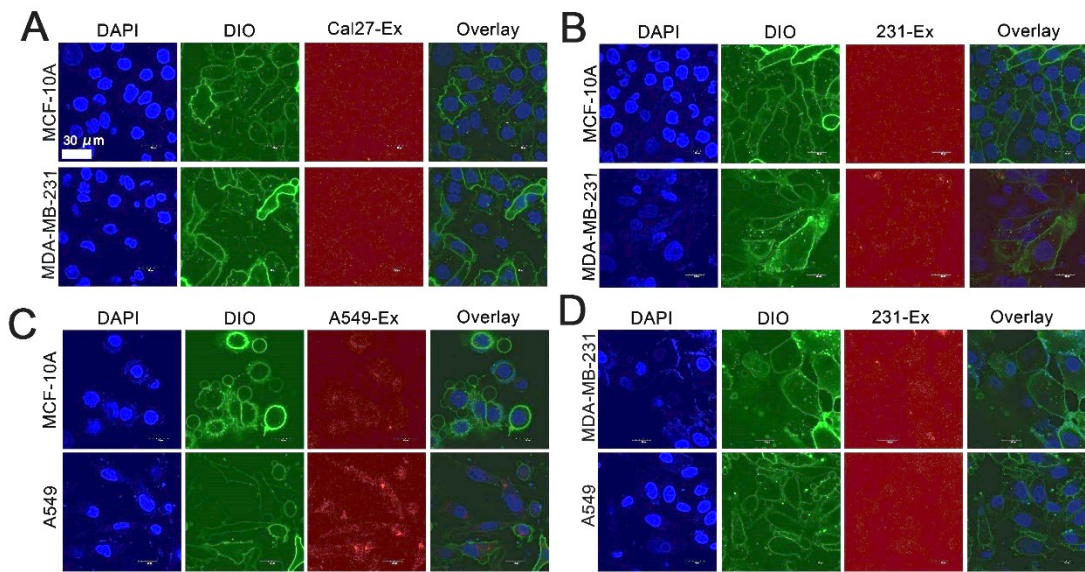

**Figure S10.** CLSM images of exosomes from different cell sources co-incubated with different cells. (A) Cal 27-Ex and (B) MDA-MB-231-Ex co-incubated with different cells of MDA-MB-231 and MCF-10A cells. (C) The A549-Ex co-incubated with different cells of A549 and MCF-10A cells. (D) The 231-Ex co-incubated with different cells of A549 and MDA-MB-231 cells.

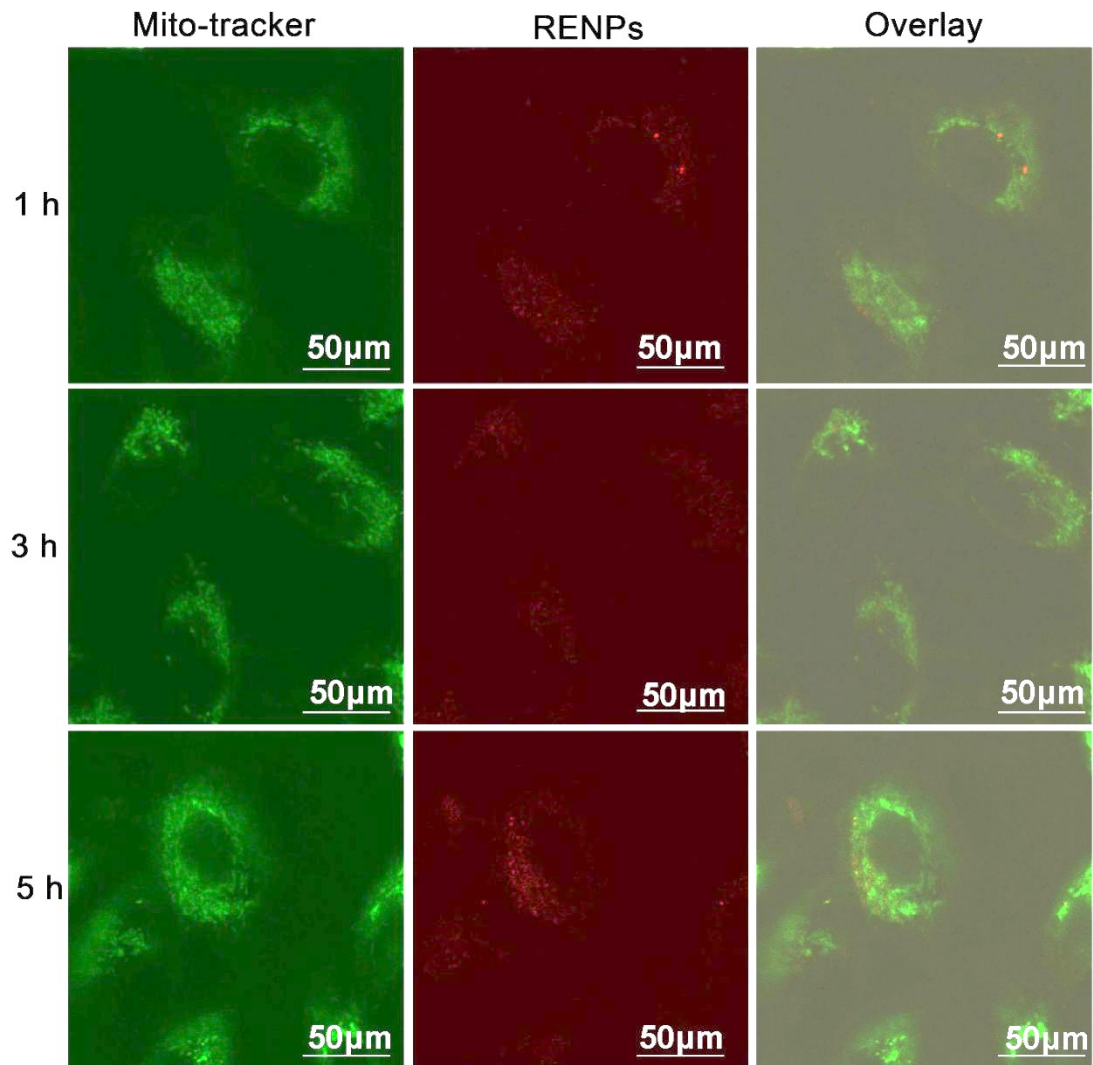

**Figure S11.** CLSM images of A549 cells incubated with RENPs at different time points.

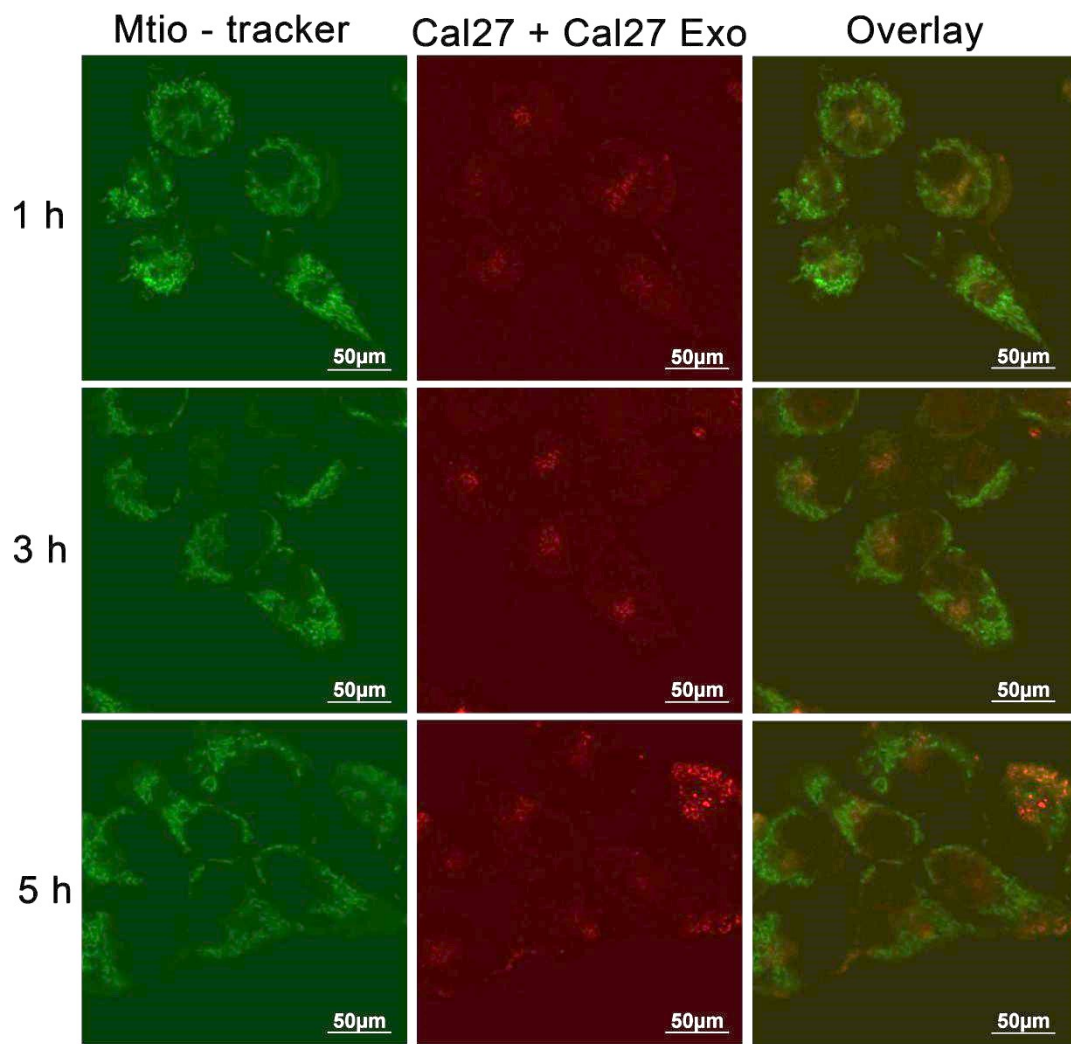

**Figure S12.** CLSM images of Cal27 cells incubated with E-RENPs from Cal27 cells at different time points.

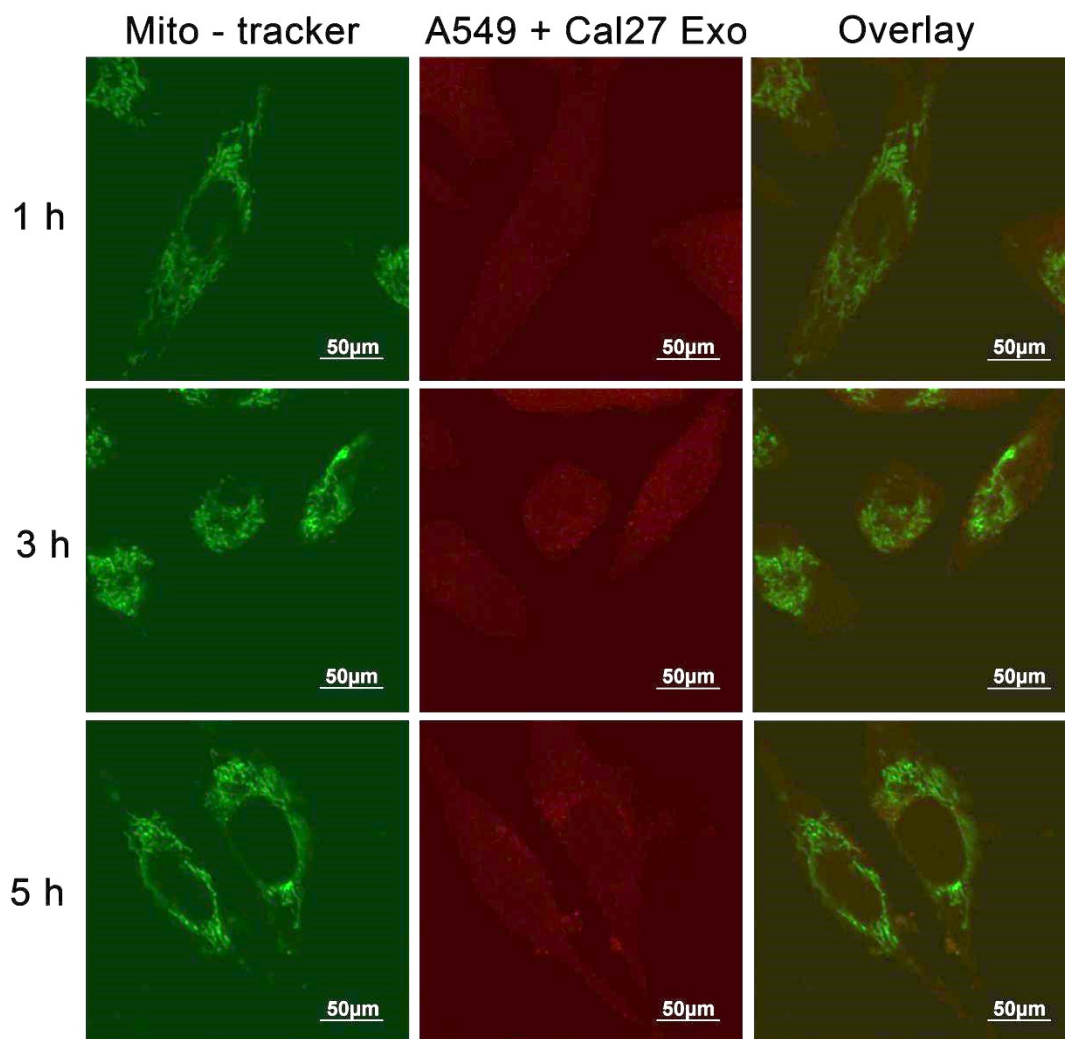

**Figure S13.** CLSM images of A549 cells incubated with E-RENPs from Cal27 cells at different time points.

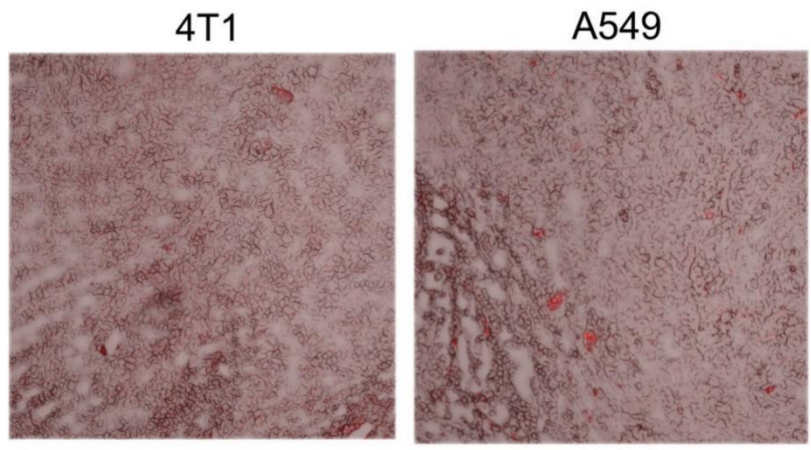

**Figure S14.** The pathological sections of 4T1 and A549 tumor.



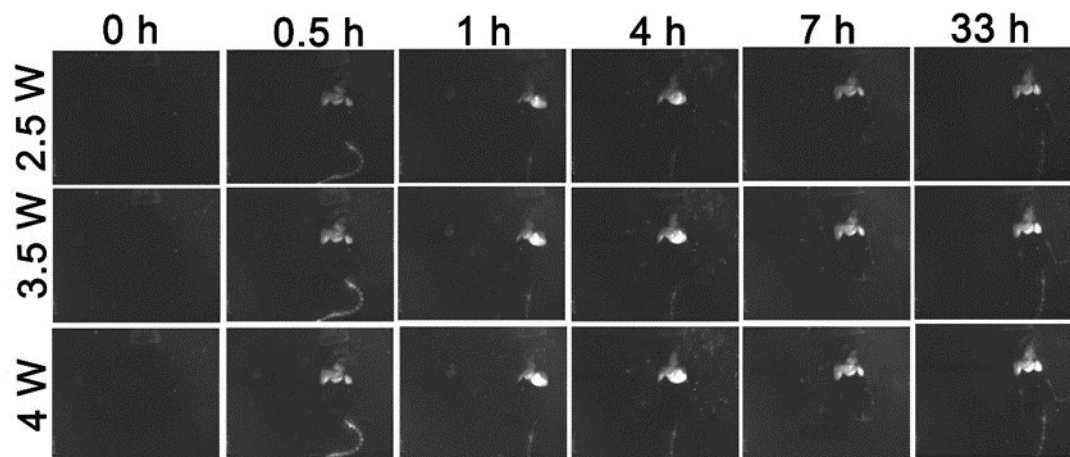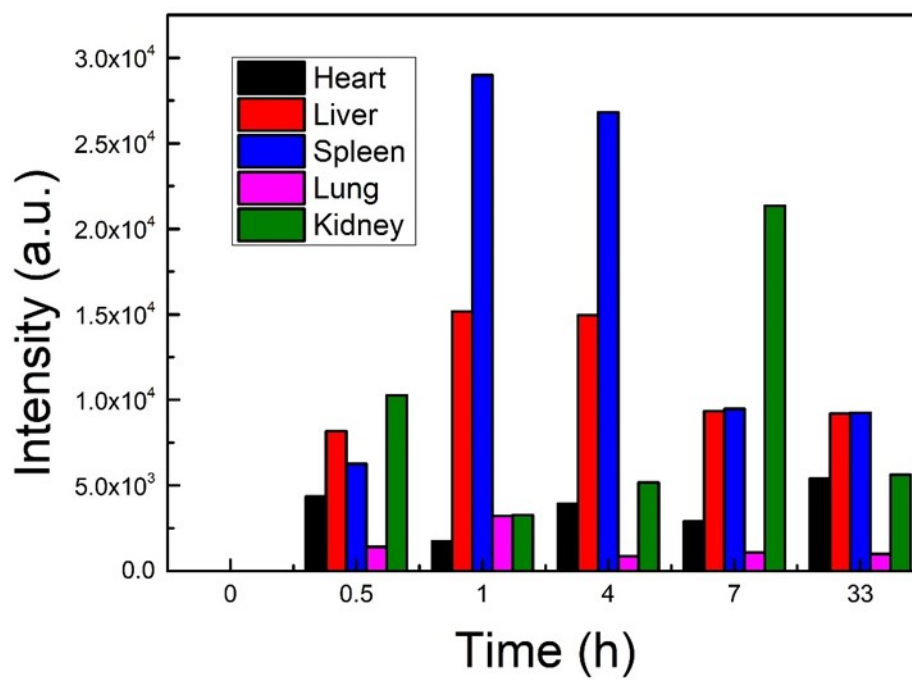

**Figure S15.** *In vivo* biodistribution photograph of the mice and the quantitative analysis of RENPs detected by the NIR II imaging under 980 nm excitation.



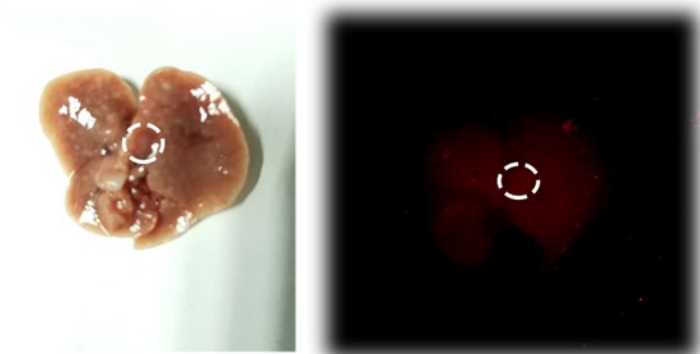

**Figure S16.** The fluorescence imaging photograph of liver metastases are sprayed of the E-RENPs.

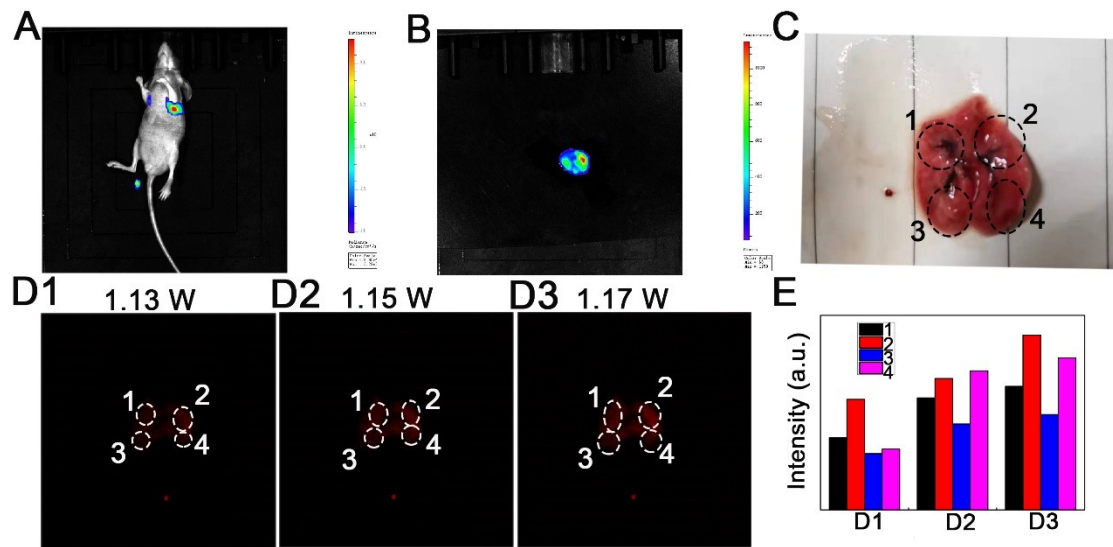

**Figure S17.** The lung of mice was dissected and recorded from another side. The Luc-fluorescence imaging of (A) the mice and (B) with lung dissected. (C) The photograph of in vitro lung metastasis. (D1-D3) The NIR II imaging image of the dissected lung tissue marked by E-RENPs and (E) their corresponding semi-quantitative analysis.

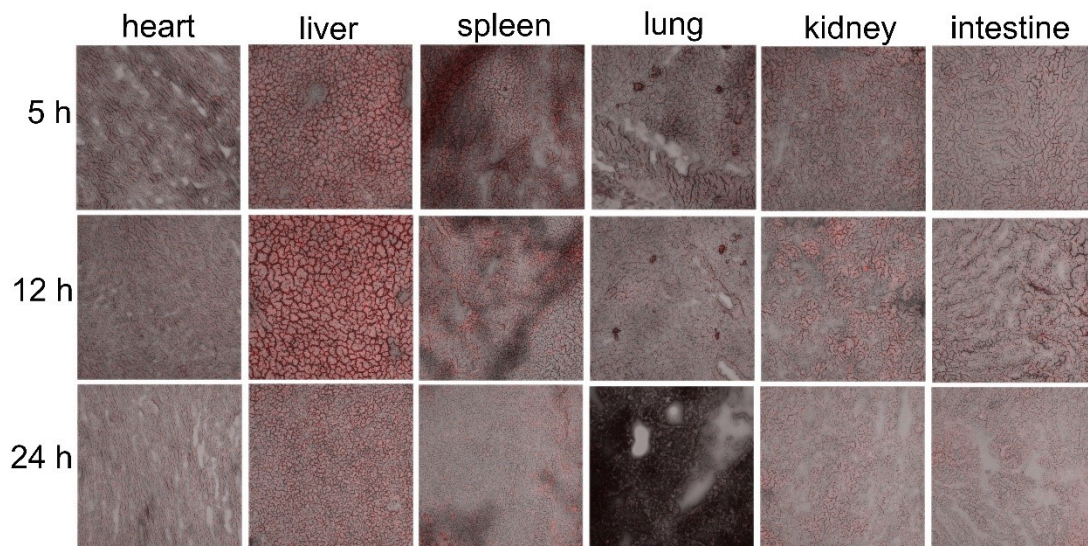

**Figure S18.** Fluorescence image of biological distribution in heart, liver, spleen, lung, kidney and intestine sections at different time points (5-24 h).

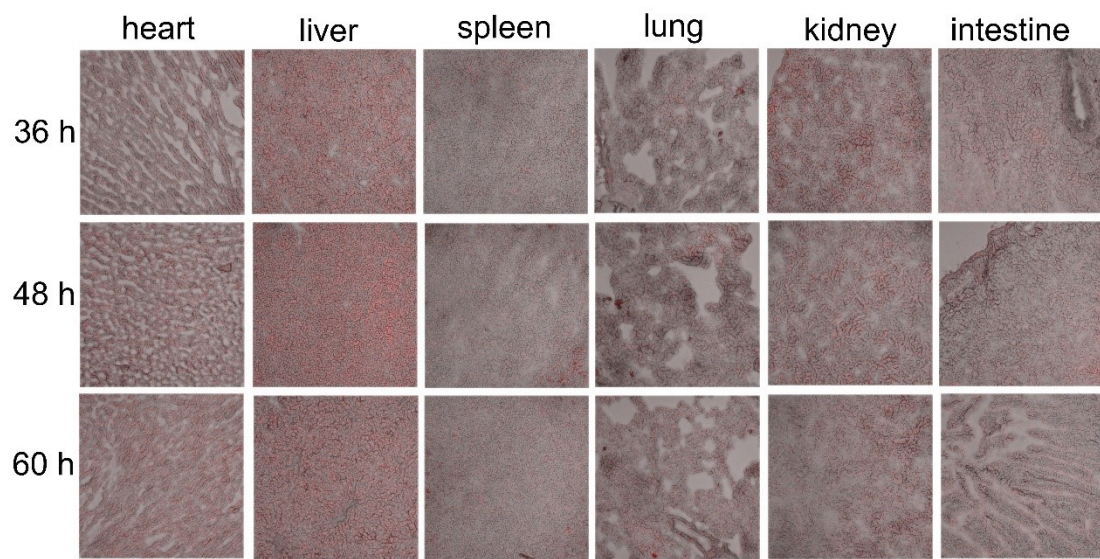

**Figure S19.** Fluorescence image of biological distribution in heart, liver, spleen, lung, kidney and intestine sections at different time points (36-60 h).

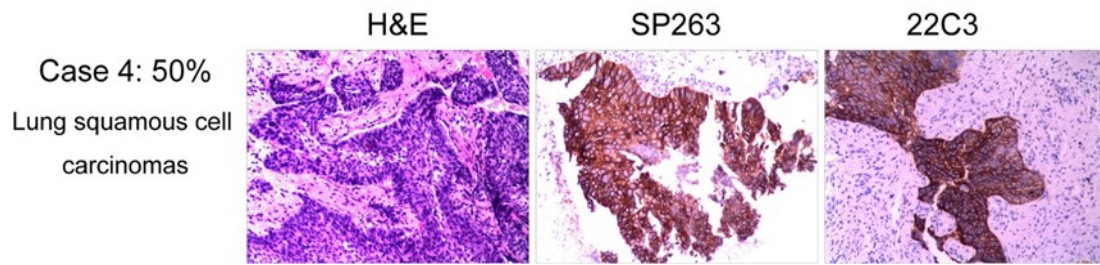

**Figure S20.** Pathology and immunohistochemistry microscopy images (using SP263 and 22C3 to mark PD-L1, respectively) of typical patients with lung adenocarcinoma.
